# Supplementary material for: Radiation-induced toxicities and outcomes after radiotherapy are independent of patient age in elderly salivary gland cancer patients: results from a matched-pair analysis of a rare disease
Source: Springer Nature journal article supplement (doi:10.1007/s00405-020-06393-x), 2020-09-30
Supplement: MOESM1 [file 18433576]

Supplementary table 1: Distribution of patient characteristics after pair-matching (n=20 for each group).

|                     |                                  | Elderly cohort<br>(≥65 years) |          | Matched cohort<br>(18-65 years) |          | p-value          |
|---------------------|----------------------------------|-------------------------------|----------|---------------------------------|----------|------------------|
|                     |                                  | Median (range)                |          | Median (range)                  |          |                  |
| <b>Age</b>          |                                  | 74 (66 – 89)                  |          | 47.5 (28 – 63)                  |          | <b>&lt;0.001</b> |
|                     |                                  | <b>n</b>                      | <b>%</b> | <b>n</b>                        | <b>%</b> |                  |
| <b>Sex</b>          | male                             | 8                             | 40.0     | 9                               | 45.0     | 0.749            |
|                     | female                           | 12                            | 60.0     | 11                              | 55.0     |                  |
| <b>Smoking</b>      | non-smoker                       | 16                            | 80.0     | 16                              | 80.0     | 1.000            |
|                     | smoker                           | 4                             | 20.0     | 4                               | 20.0     |                  |
| <b>ECOG</b>         | 0                                | 17                            | 85.0     | 17                              | 85.0     | 1.000            |
|                     | 1-2                              | 3                             | 15.0     | 3                               | 15.0     |                  |
| <b>CCI</b>          | 2                                | 17                            | 85.0     | 17                              | 85.0     | 1.000            |
|                     | 3-8                              | 3                             | 15.0     | 3                               | 15.0     |                  |
| <b>T stage</b>      | T1/T2                            | 9                             | 45.0     | 13                              | 65.0     | 0.204            |
|                     | T3/T4                            | 11                            | 55.0     | 7                               | 35.0     |                  |
| <b>N stage</b>      | N0                               | 10                            | 50.0     | 11                              | 55.0     | 0.752            |
|                     | N1/N2/N3                         | 10                            | 50.0     | 9                               | 45.0     |                  |
| <b>M stage</b>      | M0                               | 20                            | 100.0    | 19                              | 95.0     | 0.311            |
|                     | M1                               | 0                             | 0.0      | 1                               | 5.0      |                  |
| <b>Localization</b> | parotid gland                    | 17                            | 85.0     | 10                              | 50.0     | 0.060            |
|                     | submandibular gland              | 2                             | 10.0     | 6                               | 30.0     |                  |
|                     | minor salivary glands            | 1                             | 5.0      | 4                               | 20.0     |                  |
| <b>Grading</b>      | G1/G2                            | 8                             | 40.0     | 15                              | 75.0     | 0.054            |
|                     | G3/G4                            | 10                            | 50.0     | 5                               | 25.0     |                  |
|                     | unknown                          | 2                             | 10.0     | 0                               | 0.0      |                  |
| <b>Histology</b>    | adenocarcinoma                   | 11                            | 55.0     | 3                               | 15.0     | <b>0.048</b>     |
|                     | squamous cell carcinoma          | 2                             | 10.0     | 1                               | 5.0      |                  |
|                     | mucoepidermoid carcinoma         | 1                             | 5.0      | 5                               | 25.0     |                  |
|                     | acinic cell carcinoma            | 2                             | 10.0     | 2                               | 10.0     |                  |
|                     | adenoid cystic carcinoma         | 1                             | 5.0      | 7                               | 35.0     |                  |
|                     | carcinoma in pleomorphic adenoma | 0                             | 0.0      | 1                               | 5.0      |                  |
|                     | others                           | 3 <sup>a</sup>                | 15.0     | 1 <sup>b</sup>                  | 5.0      |                  |
| <b>Concept</b>      | definitive                       | 5                             | 25.0     | 1                               | 5.0      | 0.077            |
|                     | adjuvant                         | 15                            | 75.0     | 19                              | 95.0     |                  |
| <b>Chemotherapy</b> | no chemotherapy                  | 12                            | 59.1     | 16                              | 81.8     | 0.168            |
|                     | chemotherapy                     | 8                             | 40.9     | 4                               | 19.2     |                  |

<sup>a</sup>undifferentiated carcinoma (n=1), lymphoepithelial carcinoma (n=1), myoepithelial carcinoma (n=1)

<sup>b</sup>liposarcoma

Supplementary table 2: Toxicity results after radiotherapy or chemoradiotherapy of elderly patients with salivary gland cancer according to the CTCAE v5.0.

| <b>Acute (n=29)</b>   | <b>n</b> | <b>%</b> |
|-----------------------|----------|----------|
| CTCAE 1/2             | 20       | 69.0     |
| CTCAE 3               | 9        | 31.0     |
| CTCAE 4/5             | 0        | 0.0      |
| <b>Chronic (n=24)</b> |          |          |
| CTCAE 0               | 1        | 4.2      |
| CTCAE 1 – 2           | 20       | 83.3     |
| CTCAE 3               | 3        | 12.5     |
| CTCAE 4/5             | 0        | 0.0      |

Supplementary Table 3: Toxicity results consisting various (chemo)radiotherapy-related adverse reactions according to the Common Terminology Criteria for Adverse Events (CTCAE) v5.0.

| <b>Acute</b>                     | <b>CTCAE grade</b> |          |          |          |          |          |
|----------------------------------|--------------------|----------|----------|----------|----------|----------|
|                                  | <b>0</b>           | <b>1</b> | <b>2</b> | <b>3</b> | <b>4</b> | <b>5</b> |
| dermatitis                       | 1                  | 10       | 16       | 2        | 0        | 0        |
| dysphagia                        | 16                 | 9        | 3        | 1        | 0        | 0        |
| nausea                           | 28                 | 1        | 0        | 0        | 0        | 0        |
| mucositis                        | 8                  | 4        | 12       | 5        | 0        | 0        |
| xerostomia                       | 16                 | 12       | 1        | 0        | 0        | 0        |
| dysgeusia                        | 16                 | 9        | 4        | 0        | 0        | 0        |
| pain                             | 14                 | 7        | 8        | 0        | 0        | 0        |
| cytopenia <sup>a</sup>           | 14                 | 9        | 3        | 2        | 0        | 0        |
| weight loss <sup>b</sup>         | 10                 | 2        | 5        | 0        | 0        | 0        |
| acute kidney injury <sup>c</sup> | 19                 | 4        | 1        | 0        | 0        | 0        |
| <b>Chronic (n=24)</b>            |                    |          |          |          |          |          |
| skin toxicity                    | 13                 | 8        | 2        | 1        | 0        | 0        |
| dysphagia                        | 17                 | 5        | 2        | 0        | 0        | 0        |
| mucositis                        | 22                 | 0        | 1        | 1        | 0        | 0        |
| xerostomia                       | 3                  | 19       | 2        | 0        | 0        | 0        |
| dysgeusia                        | 9                  | 13       | 2        | 0        | 0        | 0        |
| pain                             | 18                 | 4        | 0        | 2        | 0        | 0        |
| cytopenia <sup>d</sup>           | 18                 | 2        | 1        | 0        | 0        | 0        |

<sup>a</sup>unknown in 1 case

<sup>b</sup>unknown in 12 cases

<sup>c</sup>missing in 5 cases

<sup>d</sup>missing in 3 cases
